# Supplementary material for: Case Report: Adjuvant image-guided radiation therapy reduces surgical invasiveness in malignant peripheral nerve sheath tumors
Source: Frontiers journal article supplement (doi:10.3389/fonc.2023.1129537), 2023-04-21
Supplement: Data_Sheet_1.PDF [file Data_Sheet_1.PDF]

A 69 year old female presented with pain, swelling, and ecchymoses of the right forearm causing right-upper limb functional disability.

**Medical history:** Underlying schizophrenic personality disorder

**Physical examination:** Hypoesthesia in the region innervated by the median nerve and reduced motor strength in the upper extremity

**MRI results:** Large malignant peripheral nerve sheath tumor (13 x 8 x 7 cm) of the median nerve in the right forearm

July  
2021

Post-op  
Day 0

**Intervention:** Microsurgical enbloc tumor resection with median nerve sparing

1-month  
follow up

**Follow-up:** No remnants or recurrence noted on MRI with Gadolinium; no metastases revealed on whole body CT.

Post-op  
Day 35

**Intervention:** Adjuvant IGRT with VMAT

6-month  
follow up

**Follow-up:** No remnants or recurrence noted on MRI with Gadolinium; no metastases revealed on whole body CT.

1-year  
follow up

**Follow-up:** No remnants or recurrence noted on MRI with Gadolinium; no metastases revealed on whole body CT.

1.5-year  
follow up

**Follow-up:** No remnants or recurrence noted on MRI with Gadolinium; no metastases revealed on whole body CT.

Patient achieved complete oncological, functional, and cosmetic outcome with microsurgery followed by adjuvant RT
